# Supplementary material for: Calcium/calmodulin alleviates substrate inhibition in a strawberry UDP-glucosyltransferase involved in fruit anthocyanin biosynthesis
Source: BMC Plant Biol. 2016 Sep 8;16(1):197. doi: 10.1186/s12870-016-0888-z (PMC5017016; doi:10.1186/s12870-016-0888-z)
Supplement: Additional file 1:Figure S1. — Amino acid sequence alignment of FvUGT1 and six other plant UGTs. Color and intensity change indicates the differences in the level of conservation. Dark red and dark blue represent the highest and lowest conserved levels, respectively. α-helices and β-strands are marked by black lines. The putative secondary plant glycosyltransferase (PSPG) motif is underlined by a red line and 10 conserved sugar donor interacting residues of the PSPG motif are marked with black solid triangles. The putative calmodulin-binding region in FvUGT1 is indicated by a black open box. The GenBank accession numbers or sources of proteins are FvUGT1 (KP165417; F. vesca), VtGT1 (AAB81682; grape), FaGT1 (AAU09442; F. × ananassa), Ct3GT (BAF49297; C. ternatea), MtUGT78G1 (A6XNC6.1; M. truncatula), AtUGT72B1 (Q9M156.1; A. thialiana), MtUGT71G1 (AAW56092.1; M. truncatula), and MtUGT85H2 (2PQ6_A; M. truncatula). (PDF 787 kb) [file 12870_2016_888_MOESM1_ESM.pdf]

|            | N-terminal domain |  |  |  |  |  |  |  |  |  | Nβ1          |  |  |  |  |  |  |  |  |  | loopN1      |  |  |  |  |  |  |  |  |  | Na1          |  |  |  |  |  |  |  |  |  | Nβ2          |  |  |  |  |  |  |  |  |  | loopN2             |  |  |  |  |  |  |  |  |  |             |  |  |  |  |  |  |  |  |  |            |  |  |  |  |  |  |  |  |  |            |  |  |  |  |  |  |  |  |  |            |  |  |  |  |  |  |  |  |  |     |
|------------|-------------------|--|--|--|--|--|--|--|--|--|--------------|--|--|--|--|--|--|--|--|--|-------------|--|--|--|--|--|--|--|--|--|--------------|--|--|--|--|--|--|--|--|--|--------------|--|--|--|--|--|--|--|--|--|--------------------|--|--|--|--|--|--|--|--|--|-------------|--|--|--|--|--|--|--|--|--|------------|--|--|--|--|--|--|--|--|--|------------|--|--|--|--|--|--|--|--|--|------------|--|--|--|--|--|--|--|--|--|-----|
| FaGT1      | APVSNQVGG         |  |  |  |  |  |  |  |  |  | - - - HVAVLA |  |  |  |  |  |  |  |  |  | FFFSTAAAL   |  |  |  |  |  |  |  |  |  | LNIVCR       |  |  |  |  |  |  |  |  |  | AAA          |  |  |  |  |  |  |  |  |  | APSTLFSFFN         |  |  |  |  |  |  |  |  |  | TKQSNSSILA  |  |  |  |  |  |  |  |  |  | 56         |  |  |  |  |  |  |  |  |  |            |  |  |  |  |  |  |  |  |  |            |  |  |  |  |  |  |  |  |  |     |
| FvUGT1     | APVSNQVGG         |  |  |  |  |  |  |  |  |  | - - - HVAVLA |  |  |  |  |  |  |  |  |  | FFFSTAAAL   |  |  |  |  |  |  |  |  |  | LNIVCR       |  |  |  |  |  |  |  |  |  | AAA          |  |  |  |  |  |  |  |  |  | APSTLFSFFN         |  |  |  |  |  |  |  |  |  | TKQSNSSILA  |  |  |  |  |  |  |  |  |  | 56         |  |  |  |  |  |  |  |  |  |            |  |  |  |  |  |  |  |  |  |            |  |  |  |  |  |  |  |  |  |     |
| VvGT1      | MSQTTTNP          |  |  |  |  |  |  |  |  |  | - - - HVAVLA |  |  |  |  |  |  |  |  |  | FFFSTAAAL   |  |  |  |  |  |  |  |  |  | LAVVR        |  |  |  |  |  |  |  |  |  | AAA          |  |  |  |  |  |  |  |  |  | APHAVSFFS          |  |  |  |  |  |  |  |  |  | TQSNASIFH   |  |  |  |  |  |  |  |  |  | 54         |  |  |  |  |  |  |  |  |  |            |  |  |  |  |  |  |  |  |  |            |  |  |  |  |  |  |  |  |  |     |
| MtUGT78G1  | STFKNEMNG         |  |  |  |  |  |  |  |  |  | NNLLHVAVLA   |  |  |  |  |  |  |  |  |  | FFFGTAAAL   |  |  |  |  |  |  |  |  |  | LSLVKK       |  |  |  |  |  |  |  |  |  | IATE         |  |  |  |  |  |  |  |  |  | APKVTFSFFC         |  |  |  |  |  |  |  |  |  | TTTTNDTLFS  |  |  |  |  |  |  |  |  |  | 60         |  |  |  |  |  |  |  |  |  |            |  |  |  |  |  |  |  |  |  |            |  |  |  |  |  |  |  |  |  |     |
| Ci3GT-A    | MK- - - -         |  |  |  |  |  |  |  |  |  | - NKQHVAFIP  |  |  |  |  |  |  |  |  |  | FFFGSLPPL   |  |  |  |  |  |  |  |  |  | LNLVLK       |  |  |  |  |  |  |  |  |  | LAHI         |  |  |  |  |  |  |  |  |  | APNTSFSFIF         |  |  |  |  |  |  |  |  |  | THSSNAFLFT  |  |  |  |  |  |  |  |  |  | 51         |  |  |  |  |  |  |  |  |  |            |  |  |  |  |  |  |  |  |  |            |  |  |  |  |  |  |  |  |  |     |
| AiUGT72B1  | ME- - - ES-       |  |  |  |  |  |  |  |  |  | - KTPHVAIP   |  |  |  |  |  |  |  |  |  | SPGMGLIPL   |  |  |  |  |  |  |  |  |  | VEFAKRL      |  |  |  |  |  |  |  |  |  | V-H          |  |  |  |  |  |  |  |  |  | LHGLTVT-FV         |  |  |  |  |  |  |  |  |  | IAGEGPSKA   |  |  |  |  |  |  |  |  |  | 51         |  |  |  |  |  |  |  |  |  |            |  |  |  |  |  |  |  |  |  |            |  |  |  |  |  |  |  |  |  |     |
| MtUGT71G1  | MS- - - MSDI      |  |  |  |  |  |  |  |  |  | NKNSELIFIP   |  |  |  |  |  |  |  |  |  | APGIGHLASA  |  |  |  |  |  |  |  |  |  | LEFAKLLTNH   |  |  |  |  |  |  |  |  |  |              |  |  |  |  |  |  |  |  |  | DKNLYITVFC         |  |  |  |  |  |  |  |  |  | IKFPGMPFAD  |  |  |  |  |  |  |  |  |  | 56         |  |  |  |  |  |  |  |  |  |            |  |  |  |  |  |  |  |  |  |            |  |  |  |  |  |  |  |  |  |     |
| MtUGT85H2  | MG- - - NFA       |  |  |  |  |  |  |  |  |  | NRKPHVVMIP   |  |  |  |  |  |  |  |  |  | YFVQGINPL   |  |  |  |  |  |  |  |  |  | FKLAKLL      |  |  |  |  |  |  |  |  |  | -H           |  |  |  |  |  |  |  |  |  | LRGFHITFVN         |  |  |  |  |  |  |  |  |  | TEYNHKRLLK  |  |  |  |  |  |  |  |  |  | 53         |  |  |  |  |  |  |  |  |  |            |  |  |  |  |  |  |  |  |  |            |  |  |  |  |  |  |  |  |  |     |
|            | Na2               |  |  |  |  |  |  |  |  |  | Nβ3          |  |  |  |  |  |  |  |  |  | 80          |  |  |  |  |  |  |  |  |  | loopN3       |  |  |  |  |  |  |  |  |  | 100          |  |  |  |  |  |  |  |  |  | Na3                |  |  |  |  |  |  |  |  |  | 120         |  |  |  |  |  |  |  |  |  |            |  |  |  |  |  |  |  |  |  |            |  |  |  |  |  |  |  |  |  |            |  |  |  |  |  |  |  |  |  |     |
| FaGT1      | G-NTSVLRY         |  |  |  |  |  |  |  |  |  | SNVSVCEVAD   |  |  |  |  |  |  |  |  |  | G-V-EGYVFV  |  |  |  |  |  |  |  |  |  | GKPKQEDIELF  |  |  |  |  |  |  |  |  |  | MKAAPDNFRF   |  |  |  |  |  |  |  |  |  | CLEASVAESG         |  |  |  |  |  |  |  |  |  | 113         |  |  |  |  |  |  |  |  |  |            |  |  |  |  |  |  |  |  |  |            |  |  |  |  |  |  |  |  |  |            |  |  |  |  |  |  |  |  |  |     |
| FvUGT1     | G-NTSVLRY         |  |  |  |  |  |  |  |  |  | SNVSVCEVAD   |  |  |  |  |  |  |  |  |  | G-V-EGYVFV  |  |  |  |  |  |  |  |  |  | GKPKQEDIELF  |  |  |  |  |  |  |  |  |  | MKAAPDNFRF   |  |  |  |  |  |  |  |  |  | CLEASVAESG         |  |  |  |  |  |  |  |  |  | 113         |  |  |  |  |  |  |  |  |  |            |  |  |  |  |  |  |  |  |  |            |  |  |  |  |  |  |  |  |  |            |  |  |  |  |  |  |  |  |  |     |
| VvGT1      | D-SMHTMQ-         |  |  |  |  |  |  |  |  |  | CNIKSYDISD   |  |  |  |  |  |  |  |  |  | G-V-EGYVFA  |  |  |  |  |  |  |  |  |  | GRPQEDIELF   |  |  |  |  |  |  |  |  |  | TRAAPESFRQ   |  |  |  |  |  |  |  |  |  | GMVMAVAETG         |  |  |  |  |  |  |  |  |  | 110         |  |  |  |  |  |  |  |  |  |            |  |  |  |  |  |  |  |  |  |            |  |  |  |  |  |  |  |  |  |            |  |  |  |  |  |  |  |  |  |     |
| MtUGT78G1  | R-SNEFLP-         |  |  |  |  |  |  |  |  |  | -NIKYYNVHD   |  |  |  |  |  |  |  |  |  | G-L-KGYVSS  |  |  |  |  |  |  |  |  |  | GNPREPDLF    |  |  |  |  |  |  |  |  |  | IKAMQENFKH   |  |  |  |  |  |  |  |  |  | VIDEAVAETG         |  |  |  |  |  |  |  |  |  | 115         |  |  |  |  |  |  |  |  |  |            |  |  |  |  |  |  |  |  |  |            |  |  |  |  |  |  |  |  |  |            |  |  |  |  |  |  |  |  |  |     |
| Ci3GT-A    | K-RHIP-           |  |  |  |  |  |  |  |  |  | NNIRVFITSD   |  |  |  |  |  |  |  |  |  | G-I-EGHVPA  |  |  |  |  |  |  |  |  |  | NNPIEKDLF    |  |  |  |  |  |  |  |  |  | LSTGPDNLK    |  |  |  |  |  |  |  |  |  | GIELAVAETK         |  |  |  |  |  |  |  |  |  | 105         |  |  |  |  |  |  |  |  |  |            |  |  |  |  |  |  |  |  |  |            |  |  |  |  |  |  |  |  |  |            |  |  |  |  |  |  |  |  |  |     |
| AiUGT72B1  | Q-RTVLDSL         |  |  |  |  |  |  |  |  |  | PS- - - SSS  |  |  |  |  |  |  |  |  |  | VFLPGLDLD   |  |  |  |  |  |  |  |  |  | LSSSTRIESR   |  |  |  |  |  |  |  |  |  | ISLTVTRSNP   |  |  |  |  |  |  |  |  |  | ELRKVFDSFV         |  |  |  |  |  |  |  |  |  | 105         |  |  |  |  |  |  |  |  |  |            |  |  |  |  |  |  |  |  |  |            |  |  |  |  |  |  |  |  |  |            |  |  |  |  |  |  |  |  |  |     |
| MtUGT71G1  | SYIKSVLASQ        |  |  |  |  |  |  |  |  |  | PQIQILIDLE   |  |  |  |  |  |  |  |  |  | VLP-PQELLK  |  |  |  |  |  |  |  |  |  | -SPEFYILTF   |  |  |  |  |  |  |  |  |  | LESILPHVKV   |  |  |  |  |  |  |  |  |  | TIKTILSNKV         |  |  |  |  |  |  |  |  |  | 115         |  |  |  |  |  |  |  |  |  |            |  |  |  |  |  |  |  |  |  |            |  |  |  |  |  |  |  |  |  |            |  |  |  |  |  |  |  |  |  |     |
| MtUGT85H2  | SRGPKAFDGF        |  |  |  |  |  |  |  |  |  | TDFNFESIPD   |  |  |  |  |  |  |  |  |  | GLTMEGDD    |  |  |  |  |  |  |  |  |  | VSQD- - VPTL |  |  |  |  |  |  |  |  |  | CQSVRKNLK    |  |  |  |  |  |  |  |  |  | PYCELLTRLN         |  |  |  |  |  |  |  |  |  | 111         |  |  |  |  |  |  |  |  |  |            |  |  |  |  |  |  |  |  |  |            |  |  |  |  |  |  |  |  |  |            |  |  |  |  |  |  |  |  |  |     |
|            | Nβ4               |  |  |  |  |  |  |  |  |  | loopN4       |  |  |  |  |  |  |  |  |  | 140         |  |  |  |  |  |  |  |  |  | Na4          |  |  |  |  |  |  |  |  |  | Nβ5          |  |  |  |  |  |  |  |  |  | loopN5             |  |  |  |  |  |  |  |  |  | 160         |  |  |  |  |  |  |  |  |  | Na5        |  |  |  |  |  |  |  |  |  | 180        |  |  |  |  |  |  |  |  |  |            |  |  |  |  |  |  |  |  |  |     |
| FaGT1      | RE- - - VSC       |  |  |  |  |  |  |  |  |  | LVTDAFWFG    |  |  |  |  |  |  |  |  |  | VHMAADMGGV  |  |  |  |  |  |  |  |  |  | PWVPFWTAGP   |  |  |  |  |  |  |  |  |  | ASLSAHVHTD   |  |  |  |  |  |  |  |  |  | LIRSTTSGGC         |  |  |  |  |  |  |  |  |  | 168         |  |  |  |  |  |  |  |  |  |            |  |  |  |  |  |  |  |  |  |            |  |  |  |  |  |  |  |  |  |            |  |  |  |  |  |  |  |  |  |     |
| FvUGT1     | RE- - - VSC       |  |  |  |  |  |  |  |  |  | LVTDAFWFG    |  |  |  |  |  |  |  |  |  | AHMAADMGGV  |  |  |  |  |  |  |  |  |  | PWVPFWTAGP   |  |  |  |  |  |  |  |  |  | ASLSAHVHTD   |  |  |  |  |  |  |  |  |  | LIRNTTGGGG         |  |  |  |  |  |  |  |  |  | 168         |  |  |  |  |  |  |  |  |  |            |  |  |  |  |  |  |  |  |  |            |  |  |  |  |  |  |  |  |  |            |  |  |  |  |  |  |  |  |  |     |
| VvGT1      | RP- - - VSC       |  |  |  |  |  |  |  |  |  | LVADAIFWFA   |  |  |  |  |  |  |  |  |  | ADMAAEMG-L  |  |  |  |  |  |  |  |  |  | AWLPFWTAGP   |  |  |  |  |  |  |  |  |  | NSLSTHYVID   |  |  |  |  |  |  |  |  |  | EIREKIGVSG         |  |  |  |  |  |  |  |  |  | 164         |  |  |  |  |  |  |  |  |  |            |  |  |  |  |  |  |  |  |  |            |  |  |  |  |  |  |  |  |  |            |  |  |  |  |  |  |  |  |  |     |
| MtUGT78G1  | KN- - - LTC       |  |  |  |  |  |  |  |  |  | LVTDAFWFG    |  |  |  |  |  |  |  |  |  | ADLAEEMH-A  |  |  |  |  |  |  |  |  |  | KWVPLWTAGP   |  |  |  |  |  |  |  |  |  | HSLTLHYVD    |  |  |  |  |  |  |  |  |  | LIREKTGSK          |  |  |  |  |  |  |  |  |  | 168         |  |  |  |  |  |  |  |  |  |            |  |  |  |  |  |  |  |  |  |            |  |  |  |  |  |  |  |  |  |            |  |  |  |  |  |  |  |  |  |     |
| Ci3GT-A    | QS- - - VTC       |  |  |  |  |  |  |  |  |  | IIADAFTVSS   |  |  |  |  |  |  |  |  |  | LLVAQTLN-V  |  |  |  |  |  |  |  |  |  | PWIAFWPNVS   |  |  |  |  |  |  |  |  |  | CSLSLYFNID   |  |  |  |  |  |  |  |  |  | LIRDKCSKDA         |  |  |  |  |  |  |  |  |  | 159         |  |  |  |  |  |  |  |  |  |            |  |  |  |  |  |  |  |  |  |            |  |  |  |  |  |  |  |  |  |            |  |  |  |  |  |  |  |  |  |     |
| AiUGT72B1  | EGGRLP- -TA       |  |  |  |  |  |  |  |  |  | LVVDLGTDA    |  |  |  |  |  |  |  |  |  | FDVAVEFH-V  |  |  |  |  |  |  |  |  |  | PPYIFYPTTA   |  |  |  |  |  |  |  |  |  | NVLSFFLHLP   |  |  |  |  |  |  |  |  |  | - - KLDVTS         |  |  |  |  |  |  |  |  |  | 160         |  |  |  |  |  |  |  |  |  |            |  |  |  |  |  |  |  |  |  |            |  |  |  |  |  |  |  |  |  |            |  |  |  |  |  |  |  |  |  |     |
| MtUGT71G1  | VST- - - -        |  |  |  |  |  |  |  |  |  | LVLDFFCVSM   |  |  |  |  |  |  |  |  |  | IDVGNFEG-I  |  |  |  |  |  |  |  |  |  | PNVLFSTSNV   |  |  |  |  |  |  |  |  |  | GFSLMLSLK    |  |  |  |  |  |  |  |  |  | NRQIEEVFSD         |  |  |  |  |  |  |  |  |  | 166         |  |  |  |  |  |  |  |  |  |            |  |  |  |  |  |  |  |  |  |            |  |  |  |  |  |  |  |  |  |            |  |  |  |  |  |  |  |  |  |     |
| MtUGT85H2  | HGTNVPVTC         |  |  |  |  |  |  |  |  |  | LVSDCCMSFT   |  |  |  |  |  |  |  |  |  | IQAAEEFE-L  |  |  |  |  |  |  |  |  |  | PNVLYFSSSA   |  |  |  |  |  |  |  |  |  | CSLNVMHF     |  |  |  |  |  |  |  |  |  | -RSFVERGII         |  |  |  |  |  |  |  |  |  | 168         |  |  |  |  |  |  |  |  |  |            |  |  |  |  |  |  |  |  |  |            |  |  |  |  |  |  |  |  |  |            |  |  |  |  |  |  |  |  |  |     |
|            | loopN5a           |  |  |  |  |  |  |  |  |  | 200          |  |  |  |  |  |  |  |  |  | Na5a        |  |  |  |  |  |  |  |  |  | loopN5b      |  |  |  |  |  |  |  |  |  | 220          |  |  |  |  |  |  |  |  |  | Na5b               |  |  |  |  |  |  |  |  |  | 240         |  |  |  |  |  |  |  |  |  |            |  |  |  |  |  |  |  |  |  |            |  |  |  |  |  |  |  |  |  |            |  |  |  |  |  |  |  |  |  |     |
| FaGT1      | HD- - EKETIT      |  |  |  |  |  |  |  |  |  | - - - - - VI |  |  |  |  |  |  |  |  |  | AGMSKVRPD   |  |  |  |  |  |  |  |  |  | LPEGII- -FGN |  |  |  |  |  |  |  |  |  | LESLSFRMLH   |  |  |  |  |  |  |  |  |  | QMGQMPPLAT         |  |  |  |  |  |  |  |  |  | 217         |  |  |  |  |  |  |  |  |  |            |  |  |  |  |  |  |  |  |  |            |  |  |  |  |  |  |  |  |  |            |  |  |  |  |  |  |  |  |  |     |
| FvUGT1     | HD- - EKETIT      |  |  |  |  |  |  |  |  |  | - - - - - VI |  |  |  |  |  |  |  |  |  | AGMSKVRPD   |  |  |  |  |  |  |  |  |  | LPEGII- -FGN |  |  |  |  |  |  |  |  |  | LESLSFRMLH   |  |  |  |  |  |  |  |  |  | QMGQMPPLAT         |  |  |  |  |  |  |  |  |  | 217         |  |  |  |  |  |  |  |  |  |            |  |  |  |  |  |  |  |  |  |            |  |  |  |  |  |  |  |  |  |            |  |  |  |  |  |  |  |  |  |     |
| VvGT1      | IQGREDELLN        |  |  |  |  |  |  |  |  |  | - - - - - FI |  |  |  |  |  |  |  |  |  | PGMSKVRFD   |  |  |  |  |  |  |  |  |  | LQEGII- -FGN |  |  |  |  |  |  |  |  |  | LNSLSFRMLH   |  |  |  |  |  |  |  |  |  | RMGQVLPKAT         |  |  |  |  |  |  |  |  |  | 215         |  |  |  |  |  |  |  |  |  |            |  |  |  |  |  |  |  |  |  |            |  |  |  |  |  |  |  |  |  |            |  |  |  |  |  |  |  |  |  |     |
| MtUGT78G1  | -EVHDKSID         |  |  |  |  |  |  |  |  |  | - - - - - VL |  |  |  |  |  |  |  |  |  | PGFPELKASD  |  |  |  |  |  |  |  |  |  | LPEGVI- -KD  |  |  |  |  |  |  |  |  |  | IDVPFATMLH   |  |  |  |  |  |  |  |  |  | KMGLELPRAN         |  |  |  |  |  |  |  |  |  | 217         |  |  |  |  |  |  |  |  |  |            |  |  |  |  |  |  |  |  |  |            |  |  |  |  |  |  |  |  |  |            |  |  |  |  |  |  |  |  |  |     |
| Ci3GT-A    | - - - - KNATLD    |  |  |  |  |  |  |  |  |  | - - - - - FL |  |  |  |  |  |  |  |  |  | PGLSKLRVED  |  |  |  |  |  |  |  |  |  | VPQMDLVGE    |  |  |  |  |  |  |  |  |  | KETLFSRTL    |  |  |  |  |  |  |  |  |  | SLGVVLQPAK         |  |  |  |  |  |  |  |  |  | 207         |  |  |  |  |  |  |  |  |  |            |  |  |  |  |  |  |  |  |  |            |  |  |  |  |  |  |  |  |  |            |  |  |  |  |  |  |  |  |  |     |
| AiUGT72B1  | EFRELTEPLM        |  |  |  |  |  |  |  |  |  | - - - - - L  |  |  |  |  |  |  |  |  |  | PGCVPVAGKD  |  |  |  |  |  |  |  |  |  | FLD- - PAQDR |  |  |  |  |  |  |  |  |  | KDDAYKWLH    |  |  |  |  |  |  |  |  |  | -NTKRYKEA          |  |  |  |  |  |  |  |  |  | 208         |  |  |  |  |  |  |  |  |  |            |  |  |  |  |  |  |  |  |  |            |  |  |  |  |  |  |  |  |  |            |  |  |  |  |  |  |  |  |  |     |
| MtUGT71G1  | SDRD- -QLLN       |  |  |  |  |  |  |  |  |  | - - - - -    |  |  |  |  |  |  |  |  |  | PGISNQVPSN  |  |  |  |  |  |  |  |  |  | VLP- - DACFN |  |  |  |  |  |  |  |  |  | KDGGYIAYYK   |  |  |  |  |  |  |  |  |  | -LAERFRDTK         |  |  |  |  |  |  |  |  |  | 213         |  |  |  |  |  |  |  |  |  |            |  |  |  |  |  |  |  |  |  |            |  |  |  |  |  |  |  |  |  |            |  |  |  |  |  |  |  |  |  |     |
| MtUGT85H2  | PFKDESYLTN        |  |  |  |  |  |  |  |  |  | GCLETKVDWI   |  |  |  |  |  |  |  |  |  | PGLKNFRLKD  |  |  |  |  |  |  |  |  |  | IVDFIRTTNP   |  |  |  |  |  |  |  |  |  | NDIMLEFFIE   |  |  |  |  |  |  |  |  |  | -VADRVNKDT         |  |  |  |  |  |  |  |  |  | 227         |  |  |  |  |  |  |  |  |  |            |  |  |  |  |  |  |  |  |  |            |  |  |  |  |  |  |  |  |  |            |  |  |  |  |  |  |  |  |  |     |
|            | Nβ6               |  |  |  |  |  |  |  |  |  | Na6          |  |  |  |  |  |  |  |  |  | 260         |  |  |  |  |  |  |  |  |  | Nβ7          |  |  |  |  |  |  |  |  |  | 280          |  |  |  |  |  |  |  |  |  | interdomain linker |  |  |  |  |  |  |  |  |  | 300         |  |  |  |  |  |  |  |  |  |            |  |  |  |  |  |  |  |  |  |            |  |  |  |  |  |  |  |  |  |            |  |  |  |  |  |  |  |  |  |     |
| FaGT1      | AVFI NSFEEL       |  |  |  |  |  |  |  |  |  | DP-VIT--ND   |  |  |  |  |  |  |  |  |  | LKSFKRFLN   |  |  |  |  |  |  |  |  |  | VGFL--DLL    |  |  |  |  |  |  |  |  |  | -EPPASAATT   |  |  |  |  |  |  |  |  |  | TPQTAAEAVA         |  |  |  |  |  |  |  |  |  | 270         |  |  |  |  |  |  |  |  |  |            |  |  |  |  |  |  |  |  |  |            |  |  |  |  |  |  |  |  |  |            |  |  |  |  |  |  |  |  |  |     |
| FvUGT1     | AVFI NSFEEL       |  |  |  |  |  |  |  |  |  | DP-VIT--ND   |  |  |  |  |  |  |  |  |  | LKSFKRFLN   |  |  |  |  |  |  |  |  |  | VGFL--DLL    |  |  |  |  |  |  |  |  |  | -EPPASAATT   |  |  |  |  |  |  |  |  |  | TPQTA-EAVT         |  |  |  |  |  |  |  |  |  | 269         |  |  |  |  |  |  |  |  |  |            |  |  |  |  |  |  |  |  |  |            |  |  |  |  |  |  |  |  |  |            |  |  |  |  |  |  |  |  |  |     |
| VvGT1      | AVFI NSFEEL       |  |  |  |  |  |  |  |  |  | DD-SLT--ND   |  |  |  |  |  |  |  |  |  | LKSFKTYLN   |  |  |  |  |  |  |  |  |  | IGFF--NLI    |  |  |  |  |  |  |  |  |  | -TPPPVVPNT   |  |  |  |  |  |  |  |  |  | T-----             |  |  |  |  |  |  |  |  |  | 259         |  |  |  |  |  |  |  |  |  |            |  |  |  |  |  |  |  |  |  |            |  |  |  |  |  |  |  |  |  |            |  |  |  |  |  |  |  |  |  |     |
| MtUGT78G1  | AVA NSATI         |  |  |  |  |  |  |  |  |  | HP-LIE--NE   |  |  |  |  |  |  |  |  |  | LNSFKLLN    |  |  |  |  |  |  |  |  |  | VGFF--NLT    |  |  |  |  |  |  |  |  |  | -TPQRKVSDE   |  |  |  |  |  |  |  |  |  | -----              |  |  |  |  |  |  |  |  |  | 260         |  |  |  |  |  |  |  |  |  |            |  |  |  |  |  |  |  |  |  |            |  |  |  |  |  |  |  |  |  |            |  |  |  |  |  |  |  |  |  |     |
| Ci3GT-A    | AVVVFNAEL         |  |  |  |  |  |  |  |  |  | DPPLFV--KY   |  |  |  |  |  |  |  |  |  | MRSKLQSLY   |  |  |  |  |  |  |  |  |  | VVFLPCQLL    |  |  |  |  |  |  |  |  |  | -LPE-----    |  |  |  |  |  |  |  |  |  | -ID                |  |  |  |  |  |  |  |  |  | 250         |  |  |  |  |  |  |  |  |  |            |  |  |  |  |  |  |  |  |  |            |  |  |  |  |  |  |  |  |  |            |  |  |  |  |  |  |  |  |  |     |
| AiUGT72B1  | GILVTFEEL         |  |  |  |  |  |  |  |  |  | EPNAIKALQE   |  |  |  |  |  |  |  |  |  | PGLDKPPVYP  |  |  |  |  |  |  |  |  |  | VGFLV--NI    |  |  |  |  |  |  |  |  |  | GKQEAQ--QT   |  |  |  |  |  |  |  |  |  | -----E             |  |  |  |  |  |  |  |  |  | 254         |  |  |  |  |  |  |  |  |  |            |  |  |  |  |  |  |  |  |  |            |  |  |  |  |  |  |  |  |  |            |  |  |  |  |  |  |  |  |  |     |
| MtUGT71G1  | GIIVNTSDI         |  |  |  |  |  |  |  |  |  | EQSSIDALYS   |  |  |  |  |  |  |  |  |  | HDEKIPPIYA  |  |  |  |  |  |  |  |  |  | VGFL--DLK    |  |  |  |  |  |  |  |  |  | GQPNPKLDQA   |  |  |  |  |  |  |  |  |  | -----Q             |  |  |  |  |  |  |  |  |  | 262         |  |  |  |  |  |  |  |  |  |            |  |  |  |  |  |  |  |  |  |            |  |  |  |  |  |  |  |  |  |            |  |  |  |  |  |  |  |  |  |     |
| MtUGT85H2  | TILLNTNEL         |  |  |  |  |  |  |  |  |  | ESDVINALSS   |  |  |  |  |  |  |  |  |  | -TIPSIYP    |  |  |  |  |  |  |  |  |  | IGFLP--SL    |  |  |  |  |  |  |  |  |  | -KQTPQIHQ    |  |  |  |  |  |  |  |  |  | DSLDSNLWKE         |  |  |  |  |  |  |  |  |  | 281         |  |  |  |  |  |  |  |  |  |            |  |  |  |  |  |  |  |  |  |            |  |  |  |  |  |  |  |  |  |            |  |  |  |  |  |  |  |  |  |     |
| C-terminal | domain            |  |  |  |  |  |  |  |  |  | Ca0          |  |  |  |  |  |  |  |  |  | Cβ1         |  |  |  |  |  |  |  |  |  | 320          |  |  |  |  |  |  |  |  |  | loopC1       |  |  |  |  |  |  |  |  |  | Ca1                |  |  |  |  |  |  |  |  |  | 340         |  |  |  |  |  |  |  |  |  | Cβ2        |  |  |  |  |  |  |  |  |  | Ca2        |  |  |  |  |  |  |  |  |  | 360        |  |  |  |  |  |  |  |  |  |     |
| FaGT1      | GDGCLSYLDE        |  |  |  |  |  |  |  |  |  | QKVASVYVVS   |  |  |  |  |  |  |  |  |  | FGSV-TRPSP  |  |  |  |  |  |  |  |  |  | EELMALAEA    |  |  |  |  |  |  |  |  |  | EASRVPLWS    |  |  |  |  |  |  |  |  |  | LRDNLKNR--         |  |  |  |  |  |  |  |  |  | 327         |  |  |  |  |  |  |  |  |  |            |  |  |  |  |  |  |  |  |  |            |  |  |  |  |  |  |  |  |  |            |  |  |  |  |  |  |  |  |  |     |
| FvUGT1     | GDGCLSYLDK        |  |  |  |  |  |  |  |  |  | QKAASVYVVS   |  |  |  |  |  |  |  |  |  | FGSV-TRPSP  |  |  |  |  |  |  |  |  |  | EELMALAEA    |  |  |  |  |  |  |  |  |  | EASRVPLWS    |  |  |  |  |  |  |  |  |  | LRDNLKNP--         |  |  |  |  |  |  |  |  |  | 326         |  |  |  |  |  |  |  |  |  |            |  |  |  |  |  |  |  |  |  |            |  |  |  |  |  |  |  |  |  |            |  |  |  |  |  |  |  |  |  |     |
| VvGT1      | -GCLQYLKE         |  |  |  |  |  |  |  |  |  | RKPTSVYVVS   |  |  |  |  |  |  |  |  |  | FGTV-TTPPP  |  |  |  |  |  |  |  |  |  | AEVVALSEAL   |  |  |  |  |  |  |  |  |  | EASRVPLWS    |  |  |  |  |  |  |  |  |  | LRDKARVH--         |  |  |  |  |  |  |  |  |  | 314         |  |  |  |  |  |  |  |  |  |            |  |  |  |  |  |  |  |  |  |            |  |  |  |  |  |  |  |  |  |            |  |  |  |  |  |  |  |  |  |     |
| MtUGT78G1  | HGCLSYLDQ         |  |  |  |  |  |  |  |  |  | HENSVVYVVS   |  |  |  |  |  |  |  |  |  | FGSV-VTPPP  |  |  |  |  |  |  |  |  |  | HELTALAES    |  |  |  |  |  |  |  |  |  | EEGFPPLWS    |  |  |  |  |  |  |  |  |  | FRGDPKEH--         |  |  |  |  |  |  |  |  |  | 316         |  |  |  |  |  |  |  |  |  |            |  |  |  |  |  |  |  |  |  |            |  |  |  |  |  |  |  |  |  |            |  |  |  |  |  |  |  |  |  |     |
| Ci3GT-A    | SNGCLSYLDS        |  |  |  |  |  |  |  |  |  | KSSRSVAYVC   |  |  |  |  |  |  |  |  |  | FGTV-VSPPP  |  |  |  |  |  |  |  |  |  | QEVVAVAEAL   |  |  |  |  |  |  |  |  |  | EESGFPVVA    |  |  |  |  |  |  |  |  |  | LKESLLSI--         |  |  |  |  |  |  |  |  |  | 307         |  |  |  |  |  |  |  |  |  |            |  |  |  |  |  |  |  |  |  |            |  |  |  |  |  |  |  |  |  |            |  |  |  |  |  |  |  |  |  |     |
| AiUGT72B1  | ESECLKYLDN        |  |  |  |  |  |  |  |  |  | QPLGSLYVVS   |  |  |  |  |  |  |  |  |  | FGSGG-TLTCT |  |  |  |  |  |  |  |  |  | EQLNELALG    |  |  |  |  |  |  |  |  |  | ADSEQRFLWV   |  |  |  |  |  |  |  |  |  | IRSPSGIANS         |  |  |  |  |  |  |  |  |  | 313         |  |  |  |  |  |  |  |  |  |            |  |  |  |  |  |  |  |  |  |            |  |  |  |  |  |  |  |  |  |            |  |  |  |  |  |  |  |  |  |     |
| MtUGT71G1  | HDLILKYDE         |  |  |  |  |  |  |  |  |  | QPDKSVVFLC   |  |  |  |  |  |  |  |  |  | FGSMGVSGFP  |  |  |  |  |  |  |  |  |  | SQIREIALG    |  |  |  |  |  |  |  |  |  | KHSGRVRLV    |  |  |  |  |  |  |  |  |  | - - -SNSAEK        |  |  |  |  |  |  |  |  |  | 317         |  |  |  |  |  |  |  |  |  |            |  |  |  |  |  |  |  |  |  |            |  |  |  |  |  |  |  |  |  |            |  |  |  |  |  |  |  |  |  |     |
| MtUGT85H2  | TDECDYTES         |  |  |  |  |  |  |  |  |  | KEPGSVVYVN   |  |  |  |  |  |  |  |  |  | FGSTTV-MTP  |  |  |  |  |  |  |  |  |  | EQLEFAWGL    |  |  |  |  |  |  |  |  |  | ANCKKSLWI    |  |  |  |  |  |  |  |  |  | IRPDLVIGGS         |  |  |  |  |  |  |  |  |  | 340         |  |  |  |  |  |  |  |  |  |            |  |  |  |  |  |  |  |  |  |            |  |  |  |  |  |  |  |  |  |            |  |  |  |  |  |  |  |  |  |     |
|            | loopC2            |  |  |  |  |  |  |  |  |  | 380          |  |  |  |  |  |  |  |  |  | Ca2b        |  |  |  |  |  |  |  |  |  | Cβ3          |  |  |  |  |  |  |  |  |  | Ca3          |  |  |  |  |  |  |  |  |  | 400                |  |  |  |  |  |  |  |  |  | Cβ4         |  |  |  |  |  |  |  |  |  | 420        |  |  |  |  |  |  |  |  |  |            |  |  |  |  |  |  |  |  |  |            |  |  |  |  |  |  |  |  |  |     |
| FaGT1      | - - - - -         |  |  |  |  |  |  |  |  |  | - - - QLDEF  |  |  |  |  |  |  |  |  |  | L           |  |  |  |  |  |  |  |  |  | SKGKLN--     |  |  |  |  |  |  |  |  |  | M            |  |  |  |  |  |  |  |  |  | VVPVAPQPV          |  |  |  |  |  |  |  |  |  | L           |  |  |  |  |  |  |  |  |  | AGSVGAFV   |  |  |  |  |  |  |  |  |  | THCGWNSVLE |  |  |  |  |  |  |  |  |  | 371        |  |  |  |  |  |  |  |  |  |     |
| FvUGT1     | - - - - -         |  |  |  |  |  |  |  |  |  | - - - QLDEF  |  |  |  |  |  |  |  |  |  | L           |  |  |  |  |  |  |  |  |  | RKGGKLN--    |  |  |  |  |  |  |  |  |  | M            |  |  |  |  |  |  |  |  |  | VVPVAPQPV          |  |  |  |  |  |  |  |  |  | L           |  |  |  |  |  |  |  |  |  | AGSVGAFV   |  |  |  |  |  |  |  |  |  | THCGWNSVLE |  |  |  |  |  |  |  |  |  | 370        |  |  |  |  |  |  |  |  |  |     |
| VvGT1      | - - - - -         |  |  |  |  |  |  |  |  |  | - - - LPEGL  |  |  |  |  |  |  |  |  |  | L           |  |  |  |  |  |  |  |  |  | EKTRGY--     |  |  |  |  |  |  |  |  |  | M            |  |  |  |  |  |  |  |  |  | VVPVAPQPV          |  |  |  |  |  |  |  |  |  | L           |  |  |  |  |  |  |  |  |  | AEAVGAFV   |  |  |  |  |  |  |  |  |  | THCGWNSLWE |  |  |  |  |  |  |  |  |  | 358        |  |  |  |  |  |  |  |  |  |     |
| MtUGT78G1  | - - - - -         |  |  |  |  |  |  |  |  |  | - - - LPKG   |  |  |  |  |  |  |  |  |  | L           |  |  |  |  |  |  |  |  |  | ERTKTK--     |  |  |  |  |  |  |  |  |  | K            |  |  |  |  |  |  |  |  |  | IVAVAPQVEI         |  |  |  |  |  |  |  |  |  | L           |  |  |  |  |  |  |  |  |  | KSSVGVFL   |  |  |  |  |  |  |  |  |  | THCGWNSVLE |  |  |  |  |  |  |  |  |  | 360        |  |  |  |  |  |  |  |  |  |     |
| Ci3GT-A    | - - - - -         |  |  |  |  |  |  |  |  |  | - - - LPKG   |  |  |  |  |  |  |  |  |  | L           |  |  |  |  |  |  |  |  |  | ERTSTR--     |  |  |  |  |  |  |  |  |  | K            |  |  |  |  |  |  |  |  |  | VVSVPQSHV          |  |  |  |  |  |  |  |  |  | L           |  |  |  |  |  |  |  |  |  | SGSGGVFV   |  |  |  |  |  |  |  |  |  | THCGANSVME |  |  |  |  |  |  |  |  |  | 351        |  |  |  |  |  |  |  |  |  |     |
| AiUGT72B1  | SYFDSHSQTD        |  |  |  |  |  |  |  |  |  | PLTFLPPGL    |  |  |  |  |  |  |  |  |  | L           |  |  |  |  |  |  |  |  |  | ERTTKR--     |  |  |  |  |  |  |  |  |  | V            |  |  |  |  |  |  |  |  |  | IPFVAPQAV          |  |  |  |  |  |  |  |  |  | L           |  |  |  |  |  |  |  |  |  | AAPSTGFL   |  |  |  |  |  |  |  |  |  | THCGWNSTLE |  |  |  |  |  |  |  |  |  | 372        |  |  |  |  |  |  |  |  |  |     |
| MtUGT71G1  | KVVF- - -         |  |  |  |  |  |  |  |  |  | - - - PEGFL  |  |  |  |  |  |  |  |  |  | L           |  |  |  |  |  |  |  |  |  | EWMELECKGM   |  |  |  |  |  |  |  |  |  | I            |  |  |  |  |  |  |  |  |  | ICGVAPQEV          |  |  |  |  |  |  |  |  |  | L           |  |  |  |  |  |  |  |  |  | AAKAIQGFV  |  |  |  |  |  |  |  |  |  | SHCGWNSILE |  |  |  |  |  |  |  |  |  | 365        |  |  |  |  |  |  |  |  |  |     |
| MtUGT85H2  | VIFSS- - -        |  |  |  |  |  |  |  |  |  | - - - - -    |  |  |  |  |  |  |  |  |  | - - - - -   |  |  |  |  |  |  |  |  |  | L            |  |  |  |  |  |  |  |  |  | NEIADRR      |  |  |  |  |  |  |  |  |  | L                  |  |  |  |  |  |  |  |  |  | IASVCRQDKV  |  |  |  |  |  |  |  |  |  | L          |  |  |  |  |  |  |  |  |  | NPSIGGL    |  |  |  |  |  |  |  |  |  | THCGWNSTTE |  |  |  |  |  |  |  |  |  | 386 |
|            | Cβ4               |  |  |  |  |  |  |  |  |  | Cβ5          |  |  |  |  |  |  |  |  |  | 440         |  |  |  |  |  |  |  |  |  | Ca5          |  |  |  |  |  |  |  |  |  | Cβ6          |  |  |  |  |  |  |  |  |  | 460                |  |  |  |  |  |  |  |  |  | PSPG motif  |  |  |  |  |  |  |  |  |  | Ca6        |  |  |  |  |  |  |  |  |  | 480        |  |  |  |  |  |  |  |  |  |            |  |  |  |  |  |  |  |  |  |     |
| FaGT1      | SVAGGVFLIC        |  |  |  |  |  |  |  |  |  | RPFFGDGLN    |  |  |  |  |  |  |  |  |  | L           |  |  |  |  |  |  |  |  |  | ARMVEDVWKI   |  |  |  |  |  |  |  |  |  | GLRL- - - -  |  |  |  |  |  |  |  |  |  | -                  |  |  |  |  |  |  |  |  |  | EGGVFTKNG   |  |  |  |  |  |  |  |  |  | MLKSLDMLLS |  |  |  |  |  |  |  |  |  | 424        |  |  |  |  |  |  |  |  |  |            |  |  |  |  |  |  |  |  |  |     |
| FvUGT1     | SVAGGVFLIC        |  |  |  |  |  |  |  |  |  | RPFFGDGLN    |  |  |  |  |  |  |  |  |  | L           |  |  |  |  |  |  |  |  |  | ARMVEDVWKI   |  |  |  |  |  |  |  |  |  | GLRL- - - -  |  |  |  |  |  |  |  |  |  | -                  |  |  |  |  |  |  |  |  |  | EGGVFTKNG   |  |  |  |  |  |  |  |  |  | MLKSLDMLLS |  |  |  |  |  |  |  |  |  | 423        |  |  |  |  |  |  |  |  |  |            |  |  |  |  |  |  |  |  |  |     |
| VvGT1      | SVAGGVFLIC        |  |  |  |  |  |  |  |  |  | RPFFGDGLN    |  |  |  |  |  |  |  |  |  | L           |  |  |  |  |  |  |  |  |  | GRMVEDVLEI   |  |  |  |  |  |  |  |  |  | GVRI- - - -  |  |  |  |  |  |  |  |  |  | -                  |  |  |  |  |  |  |  |  |  | EGGVFTKSG   |  |  |  |  |  |  |  |  |  | LMSCFDQILS |  |  |  |  |  |  |  |  |  | 411        |  |  |  |  |  |  |  |  |  |            |  |  |  |  |  |  |  |  |  |     |
| MtUGT78G1  | CIVSGVMTIS        |  |  |  |  |  |  |  |  |  | RPFFGDGLN    |  |  |  |  |  |  |  |  |  | L           |  |  |  |  |  |  |  |  |  | TILTSVLEI    |  |  |  |  |  |  |  |  |  | GVGV- - - -  |  |  |  |  |  |  |  |  |  | -                  |  |  |  |  |  |  |  |  |  | ONGVLTKEK   |  |  |  |  |  |  |  |  |  | IKKALELTVS |  |  |  |  |  |  |  |  |  | 413        |  |  |  |  |  |  |  |  |  |            |  |  |  |  |  |  |  |  |  |     |
| Ci3GT-A    | SVNSGVMLIC        |  |  |  |  |  |  |  |  |  | RPFFGDGLIA   |  |  |  |  |  |  |  |  |  | L           |  |  |  |  |  |  |  |  |  | ARVIQDIWEI   |  |  |  |  |  |  |  |  |  | GVIV- - - -  |  |  |  |  |  |  |  |  |  | -                  |  |  |  |  |  |  |  |  |  | EGKVFTKNG   |  |  |  |  |  |  |  |  |  | FVKSLNLILM |  |  |  |  |  |  |  |  |  | 404        |  |  |  |  |  |  |  |  |  |            |  |  |  |  |  |  |  |  |  |     |
| AiUGT72B1  | SVVSGTILIA        |  |  |  |  |  |  |  |  |  | WPLYAEQKMN   |  |  |  |  |  |  |  |  |  | L           |  |  |  |  |  |  |  |  |  | AVLLSED- -I  |  |  |  |  |  |  |  |  |  | RAALRP--RA   |  |  |  |  |  |  |  |  |  | L                  |  |  |  |  |  |  |  |  |  | GDDGLVRREE  |  |  |  |  |  |  |  |  |  | FARVVKGLME |  |  |  |  |  |  |  |  |  | 428        |  |  |  |  |  |  |  |  |  |            |  |  |  |  |  |  |  |  |  |     |
| MtUGT71G1  | SMWFVGLILT        |  |  |  |  |  |  |  |  |  | WPLYAEQKLN   |  |  |  |  |  |  |  |  |  | L           |  |  |  |  |  |  |  |  |  | AFRLVKEWGV   |  |  |  |  |  |  |  |  |  | GLGLRVDRK    |  |  |  |  |  |  |  |  |  | L                  |  |  |  |  |  |  |  |  |  | GSD- -VAAEE |  |  |  |  |  |  |  |  |  | IEKGLKDLMD |  |  |  |  |  |  |  |  |  | 424        |  |  |  |  |  |  |  |  |  |            |  |  |  |  |  |  |  |  |  |     |
| MtUGT85H2  | SICAGVMLC         |  |  |  |  |  |  |  |  |  | WFFADQPTD    |  |  |  |  |  |  |  |  |  | L           |  |  |  |  |  |  |  |  |  | CRFICNEWEI   |  |  |  |  |  |  |  |  |  | GMEI- - - -  |  |  |  |  |  |  |  |  |  | -                  |  |  |  |  |  |  |  |  |  | DTNVKREE    |  |  |  |  |  |  |  |  |  | LAKLINEVIA |  |  |  |  |  |  |  |  |  | 438        |  |  |  |  |  |  |  |  |  |            |  |  |  |  |  |  |  |  |  |     |
|            | Ca7               |  |  |  |  |  |  |  |  |  | 500          |  |  |  |  |  |  |  |  |  | Ca8         |  |  |  |  |  |  |  |  |  | 520          |  |  |  |  |  |  |  |  |  |              |  |  |  |  |  |  |  |  |  |                    |  |  |  |  |  |  |  |  |  |             |  |  |  |  |  |  |  |  |  |            |  |  |  |  |  |  |  |  |  |            |  |  |  |  |  |  |  |  |  |            |  |  |  |  |  |  |  |  |  |     |
| FaGT1      | QDKGTKMKNK        |  |  |  |  |  |  |  |  |  | INTLQKFAKQ   |  |  |  |  |  |  |  |  |  | L           |  |  |  |  |  |  |  |  |  | AVEPKSSAR    |  |  |  |  |  |  |  |  |  | NFESL- - - - |  |  |  |  |  |  |  |  |  | -                  |  |  |  |  |  |  |  |  |  | LEMTTTN     |  |  |  |  |  |  |  |  |  | -          |  |  |  |  |  |  |  |  |  | 466        |  |  |  |  |  |  |  |  |  |            |  |  |  |  |  |  |  |  |  |     |
| FvUGT1     | QDEGTKMRNK        |  |  |  |  |  |  |  |  |  | INTLQKIAQQ   |  |  |  |  |  |  |  |  |  | L           |  |  |  |  |  |  |  |  |  | AVEPKSSSTR   |  |  |  |  |  |  |  |  |  | NFESL- - - - |  |  |  |  |  |  |  |  |  | -                  |  |  |  |  |  |  |  |  |  | LEMTTTN     |  |  |  |  |  |  |  |  |  | -          |  |  |  |  |  |  |  |  |  | 465        |  |  |  |  |  |  |  |  |  |            |  |  |  |  |  |  |  |  |  |     |
| VvGT1      | SEKGGKLRN         |  |  |  |  |  |  |  |  |  | LRALRETADR   |  |  |  |  |  |  |  |  |  | L           |  |  |  |  |  |  |  |  |  | AVGPKSSSTE   |  |  |  |  |  |  |  |  |  | NFITL- - - - |  |  |  |  |  |  |  |  |  | -                  |  |  |  |  |  |  |  |  |  | VDLVSKP     |  |  |  |  |  |  |  |  |  | KDV        |  |  |  |  |  |  |  |  |  | 456        |  |  |  |  |  |  |  |  |  |            |  |  |  |  |  |  |  |  |  |     |
| MtUGT78G1  | QEKGGIMRQK        |  |  |  |  |  |  |  |  |  | IVKLKESAFK   |  |  |  |  |  |  |  |  |  | L           |  |  |  |  |  |  |  |  |  | AVEQNTSAM    |  |  |  |  |  |  |  |  |  | DFTTL- - - - |  |  |  |  |  |  |  |  |  | -                  |  |  |  |  |  |  |  |  |  | IQIVTS      |  |  |  |  |  |  |  |  |  | -          |  |  |  |  |  |  |  |  |  | 454        |  |  |  |  |  |  |  |  |  |            |  |  |  |  |  |  |  |  |  |     |
| Ci3GT-A    | QEDGKKIRDN        |  |  |  |  |  |  |  |  |  | ALKVKQIVQD   |  |  |  |  |  |  |  |  |  | L           |  |  |  |  |  |  |  |  |  | AVGPHQAEE    |  |  |  |  |  |  |  |  |  | DFNTL- - - - |  |  |  |  |  |  |  |  |  | -                  |  |  |  |  |  |  |  |  |  | VEVISSS     |  |  |  |  |  |  |  |  |  | -          |  |  |  |  |  |  |  |  |  | 446        |  |  |  |  |  |  |  |  |  |            |  |  |  |  |  |  |  |  |  |     |
| AiUGT72B1  | GEEGKGVRNK        |  |  |  |  |  |  |  |  |  | MKELKEACR    |  |  |  |  |  |  |  |  |  | L           |  |  |  |  |  |  |  |  |  | VLKDDTSTK    |  |  |  |  |  |  |  |  |  | ALSLVALKWK   |  |  |  |  |  |  |  |  |  | L                  |  |  |  |  |  |  |  |  |  | AHKKELEQN-  |  |  |  |  |  |  |  |  |  | GNH        |  |  |  |  |  |  |  |  |  | 480        |  |  |  |  |  |  |  |  |  |            |  |  |  |  |  |  |  |  |  |     |
| MtUGT71G1  | KDSI- - -VHKH     |  |  |  |  |  |  |  |  |  | VQEMKMSRN    |  |  |  |  |  |  |  |  |  | L           |  |  |  |  |  |  |  |  |  | AVVDGSSSLI   |  |  |  |  |  |  |  |  |  | SVG- - - - - |  |  |  |  |  |  |  |  |  | -                  |  |  |  |  |  |  |  |  |  | KLIDIT-     |  |  |  |  |  |  |  |  |  | GSN        |  |  |  |  |  |  |  |  |  | 465        |  |  |  |  |  |  |  |  |  |            |  |  |  |  |  |  |  |  |  |     |
| MtUGT85H2  | GDGKKMKQK         |  |  |  |  |  |  |  |  |  | AMELKKAEE    |  |  |  |  |  |  |  |  |  | L           |  |  |  |  |  |  |  |  |  | NTRPGCSYM    |  |  |  |  |  |  |  |  |  | NLN- - - - - |  |  |  |  |  |  |  |  |  | -                  |  |  |  |  |  |  |  |  |  | KVIKDVLL    |  |  |  |  |  |  |  |  |  | KQN        |  |  |  |  |  |  |  |  |  | 482        |  |  |  |  |  |  |  |  |  |            |  |  |  |  |  |  |  |  |  |     |
